# Supplementary material for: Investigation of the sodium-ion transport mechanism and elastic properties of double anti-perovskite Na3S0.5O0.5I
Source: Royal Society of Chemistry journal article supplement (doi:10.1039/d3cp02058d), 2023-01-01
Supplement: d3cp02058d2.pdf [file d3cp02058d2.pdf]

## Supporting Information

### Investigation of Sodium-ion Transport Mechanism and Elastic Properties of Double Anti-perovskite $\text{Na}_3\text{S}_{0.5}\text{O}_{0.5}\text{I}$

Sen Lian<sup>a</sup>, Congcong Li<sup>a</sup>, Chen Kang<sup>a</sup>, Junfeng Ren<sup>a</sup>, and Meina Chen<sup>a\*</sup>

<sup>a</sup> School of Physics and Electronics, Shandong Normal University, Jinan 250358, China

\* Corresponding Author: Meina Chen

Email:mnchen@sdu.edu.cn.

**Table S1. Relative energies of different conformations of Na<sub>3</sub>S<sub>0.5</sub>O<sub>0.5</sub>I.**

| Conformation | Relative energy (eV) |
|--------------|----------------------|
| 1            | 0.13                 |
| 2            | 0.17                 |
| 3            | 0.09                 |
| 4            | 0.14                 |
| 5            | <b>0.00</b>          |

**Table S2.  $E_{defect}$  of different intrinsic defect configurations of Na<sub>3</sub>OI and****Na<sub>3</sub>S<sub>0.5</sub>O<sub>0.5</sub>I.**

| Material                                            | Defect                     | $E_{defect}$ (eV) |             |       |
|-----------------------------------------------------|----------------------------|-------------------|-------------|-------|
|                                                     |                            | NN                | 2NN         | 3NN   |
| Na <sub>3</sub> OI                                  | NaI Schottky               | <b>1.65</b>       | 1.70        | 1.81  |
|                                                     | Na <sub>2</sub> O Schottky | 1.81              | <b>1.72</b> | 3.58  |
|                                                     | Na Frenkel                 | <b>2.56</b>       | 2.62        | 2.71  |
| Na <sub>3</sub> S <sub>0.5</sub> O <sub>0.5</sub> I | NaI Schottky               | <b>1.28</b>       | 1.29        | 1.40  |
|                                                     | Na <sub>2</sub> O Schottky | <b>2.33</b>       | 2.42        | 4.44  |
|                                                     | Na <sub>2</sub> S Schottky | <b>1.15</b>       | 1.16        | to NN |
|                                                     | Na Frenkel                 | <b>1.63</b>       | 1.75        | 1.76  |

**Table S3.  $E_{solution}$  of different doping configurations of Na<sub>3</sub>OI and Na<sub>3</sub>S<sub>0.5</sub>O<sub>0.5</sub>I.**

| Material           | Defect              | $E_{solution}$ (eV) |              |       |       |       |
|--------------------|---------------------|---------------------|--------------|-------|-------|-------|
|                    |                     | NN                  | 2NN          | 3NN   | 4NN   | 5NN   |
| Na <sub>3</sub> OI | $Mg_{Na}^{\bullet}$ | -1.34               | <b>-1.58</b> | -1.11 | -1.04 | -1.05 |
|                    | $Ca_{Na}^{\bullet}$ | <b>-0.46</b>        | -0.43        | -0.21 | -0.15 | -0.17 |
|                    | $Sr_{Na}^{\bullet}$ | <b>0.04</b>         | 0.26         | 0.34  | 0.41  | 0.37  |

|                       |                     |             |              |       |       |       |
|-----------------------|---------------------|-------------|--------------|-------|-------|-------|
|                       | $Ba_{Na}^{\bullet}$ | <b>0.72</b> | 1.15         | 1.15  | 1.22  | 1.15  |
| $Na_3S_{0.5}O_{0.5}I$ | $Mg_{Na}^{\bullet}$ | -0.98       | <b>-1.17</b> | -0.68 | -0.67 | -0.67 |
|                       | $Ca_{Na}^{\bullet}$ | -0.37       | <b>-0.45</b> | -0.06 | -0.06 | -0.06 |
|                       | $Sr_{Na}^{\bullet}$ | -0.05       | <b>-0.08</b> | 0.30  | 0.31  | 0.27  |
|                       | $Ba_{Na}^{\bullet}$ | <b>0.26</b> | 0.43         | 0.88  | 0.89  | 0.81  |

**Table S4.**  $E_b$  along different paths in the lowest energy doping configuration.

| Material              | Defect              | $E_b$ (eV) |        |        |        |        |
|-----------------------|---------------------|------------|--------|--------|--------|--------|
|                       |                     | Path 1     | Path 2 | Path 3 | Path 4 | Path 5 |
| $Na_3OI$              | $Mg_{Na}^{\bullet}$ | 0.58       | 0.63   |        |        |        |
|                       | $Ca_{Na}^{\bullet}$ | 0.62       | 0.50   | 0.56   | 0.66   | 0.57   |
|                       | $Sr_{Na}^{\bullet}$ | 0.67       | 0.63   | 0.55   | 0.68   | 0.59   |
|                       | $Ba_{Na}^{\bullet}$ | 0.76       | 0.77   | 0.56   | 0.75   | 0.64   |
| $Na_3S_{0.5}O_{0.5}I$ | $Mg_{Na}^{\bullet}$ | 0.32       | 0.60   |        |        |        |
|                       | $Ca_{Na}^{\bullet}$ | 0.28       | 0.65   |        |        |        |
|                       | $Sr_{Na}^{\bullet}$ | 0.21       | 0.64   |        |        |        |
|                       | $Ba_{Na}^{\bullet}$ | 0.92       | 0.28   | 0.55   | 0.49   | 0.75   |

**Table S5. Ionic conductivities and activation energies of  $Na_3S_{0.5}O_{0.5}I$ ,  $Na_3OI$  and other  $Na^+$  conducting materials.**

| Material             | Ionic conductivity                     | activation energy | References |
|----------------------|----------------------------------------|-------------------|------------|
| $Na_{10}GeP_2S_{12}$ | $4.7 \times 10^{-3} \text{ S cm}^{-1}$ | 0.2               | [58]       |

|                                                                            |                                         |       |          |
|----------------------------------------------------------------------------|-----------------------------------------|-------|----------|
| $\text{Na}_{3+x}\text{Si}_x\text{P}_{1-x}\text{S}_4$                       | $1.66 \times 10^{-3} \text{ S cm}^{-1}$ | 0.24  | [59]     |
| $\text{Na}_{3+x}\text{Ge}_x\text{P}_{1-x}\text{S}_4$                       | $5.4 \times 10^{-4} \text{ S cm}^{-1}$  | 0.28  | [59]     |
| $\text{Na}_{3+x}\text{Sn}_x\text{P}_{1-x}\text{S}_4$                       | $1.07 \times 10^{-2} \text{ S cm}^{-1}$ | 0.17  | [59]     |
| $\text{Na}_{3.1}\text{Zr}_{1.95}\text{Mg}_{0.05}\text{Si}_2\text{PO}_{12}$ | $3.5 \times 10^{-3} \text{ S cm}^{-1}$  | 0.25  | [60]     |
| $\text{Na}_{11}\text{Sn}_2\text{PS}_{12}$                                  | $1.4 \times 10^{-3} \text{ S cm}^{-1}$  | 0.25  | [61]     |
| $\text{Na}_{10}\text{SnP}_2\text{S}_{12}$                                  | $4 \times 10^{-4} \text{ S cm}^{-1}$    | 0.356 | [62]     |
| $\text{Na}_3\text{S}_{0.5}\text{O}_{0.5}\text{I}$                          | $1.2 \times 10^{-3} \text{ S cm}^{-1}$  | 0.20  | Our work |
| $\text{Na}_3\text{OI}$                                                     | $1.5 \times 10^{-6} \text{ S cm}^{-1}$  | 0.42  | Our work |

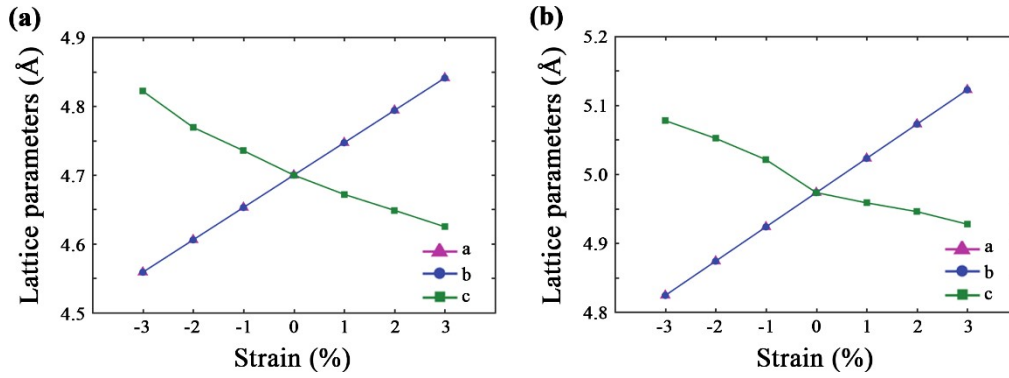

**Fig. S1. Structural parameters of (a) Na<sub>3</sub>OI and (b) Na<sub>3</sub>S<sub>0.5</sub>O<sub>0.5</sub>I under various biaxial strains in the a-b plane.**
