# Supplementary figures and images for: Investigation of the sodium-ion transport mechanism and elastic properties of double anti-perovskite Na3S0.5O0.5I
Source: Royal Society of Chemistry journal article supplement (doi:10.1039/d3cp02058d), 2023-01-01

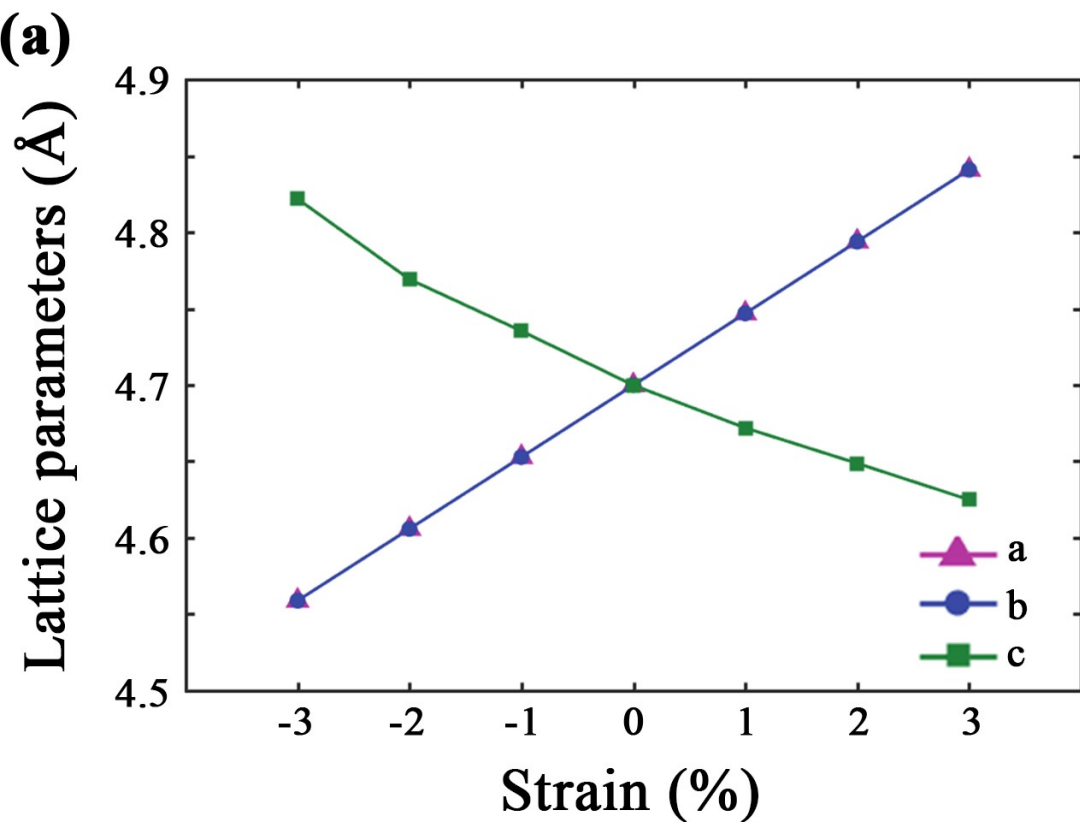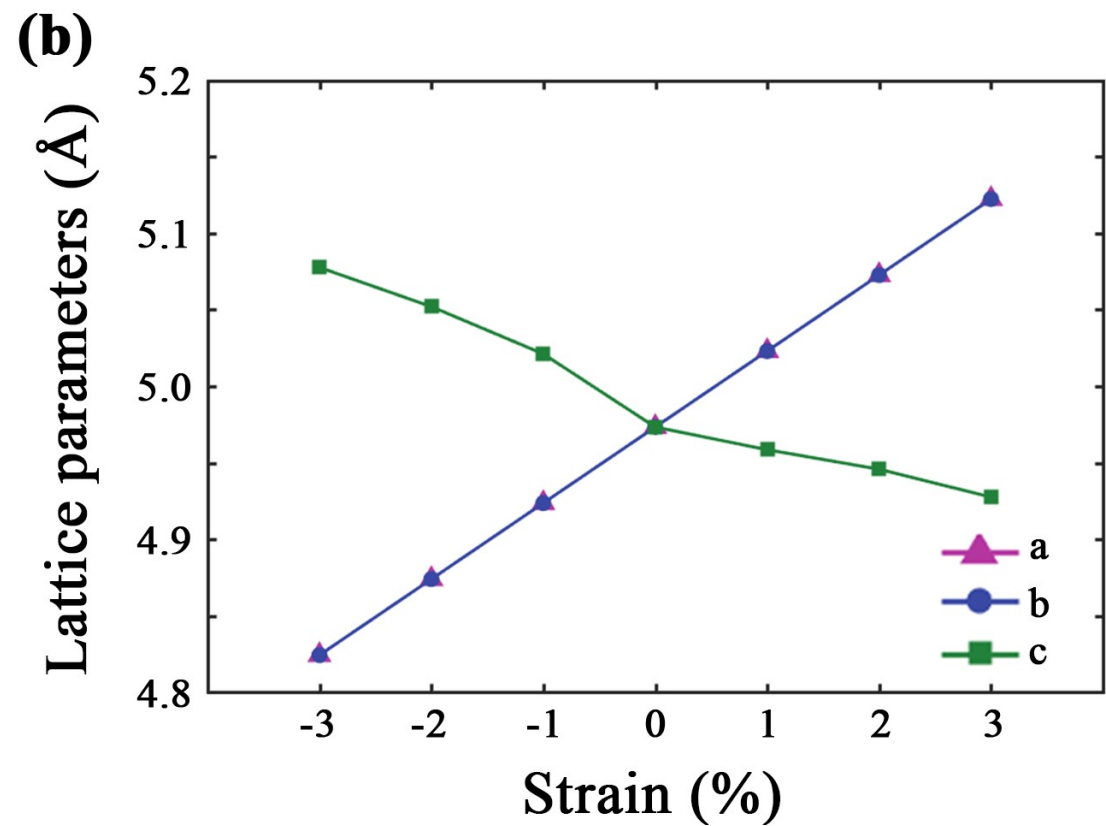

Supplement: d3cp02058d1.pdf [file d3cp02058d1.pdf]
